# Supplementary material for: Non-invasive measurement of mRNA decay reveals translation initiation as the major determinant of mRNA stability
Source: eLife. 2018 Sep 7;7:e32536. doi: 10.7554/eLife.32536 (PMC6152797; doi:10.7554/eLife.32536)
Supplement: Figure 3—source data 1. [file elife-32536-fig3-data1.xlsx]

## Sheet: B
time	mock ACT1	CHX ACT1	mock CIS3	CHX CIS3	mock RPL25	CHX RPL25
0	1	1	1	1	1	1
5	0.792283	0.808336	0.591141	0.626569	0.837976	0.825956
10	0.561906	0.600434	0.256766	0.393708	0.543989	0.747871
20	0.375406	0.430373	0.137783	0.216277	0.438822	0.554964
30	0.178971	0.212243	0.0963511	0.175236	0.195302	0.277752
40	0.0794676	0.101271	0.0768276	0.173799	0.110877	0.201258
50	0.0405425	0.064594	0.0488393	0.154506	0.0721229	0.244416

## Sheet: C
time	mock ACT1	CHX ACT1	mock CIS3	CHX CIS3	mock RPL25	CHX RPL25
0	1	1	1	1	1	1
5	0.873348	0.744077	0.70384	0.691867	0.822484	0.682856
10	0.846756	0.953733	0.41871	0.737941	0.578811	0.854786
15	0.651847	0.731808	0.289694	0.671409	0.512606	0.699267
20	0.520339	0.656589	0.213445	0.575123	0.42685	0.661567
30	0.286198	0.559472	0.14675	0.510378	0.233069	0.623142
40	0.243419	0.4867	0.170175	0.427	0.287774	0.62541
55	0.111635	0.430506	0.107211	0.29166	0.202943	0.668221

## Sheet: D-G
time	mock ACT1	3AT ACT1	mock CYS4	3AT CYS4	mock DED1	3AT DED1	mock PDC1	3AT PDC1	mock RPS2	3AT RPS2	mock TPI1	3AT TPI1	mock CIS3	3AT CIS3	mock RPC11	3AT RPC11	mock VMA21	3AT VMA21	mock NPA3	3AT NPA3	mock PAM16	3AT PAM16	mock RPL25	3AT RPL25	mock AIM7	3AT AIM7	mock AIM13	3AT AIM13	mock OSM5	3AT OSW5
0	1	1	1	1	1	1	1	1	1	1	1	1	1	1	1	1	1	1	1	1	1	1	1	1	1	1	1	1	1	1
5	0.936977	0.782552	0.647725	0.634635	0.52149	0.716836	0.962136	0.764375	0.851724	0.80387	0.878914	0.765114	0.67064	0.612036	0.66607	0.89745	0.911467	0.848793	0.72909	0.918978	0.875409	0.889306	0.885336	0.995541	0.541703	0.727965	0.498092	0.76558	0.363696	0.38298
10	0.773805	0.659921	0.272572	0.412	0.189716	0.534911	0.723517	0.623007	0.633612	0.815145	0.679498	0.813521	0.344739	0.398469	0.261908	0.56917	0.676781	0.814677	0.540365	0.9551	0.52465	0.909691	0.675172	0.908672	0.297135	0.569683	0.293324	0.463038	0.111716	0.195879
15	0.781447	0.585341	0.0998636	0.26568	0.0700647	0.419429	0.650908	0.491588	0.401609	0.692143	0.416299	0.728645	0.22376	0.330658	0.0943591	0.356399	0.365584	0.615781	0.241386	0.734918	0.226609	0.611806	0.475637	0.745997	0.161553	0.45786	0.0972562	0.317656	0.067413	0.103759
20	0.673557	0.49875	0.0503375	0.135892	0.0478623	0.332833	0.578884	0.319123	0.392705	0.436107	0.383422	0.649688	0.163272	0.234893	0.0602866	0.148876	0.299591	0.387579	0.161379	0.406496	0.164103	0.266258	0.422289	0.453879	0.112753	0.317919	0.0636871	0.158126	0.0982146	0.106274
30	0.34178	0.263325	0.0306684	0.0736181	0.0345293	0.249284	0.30078	0.0923809	0.251011	0.170103	0.181756	0.418003	0.0909465	0.13732	0.0738423	0.0947571	0.195561	0.278836	0.088441	0.234032	0.117948	0.243422	0.343665	0.173881	0.0964083	0.319921	0.0583312	0.118396	0.06094	0.143034
40	0.121549	0.196092	0.0304406	0.0908474	0.312737	0.23572	0.0996384	0.0389358	0.309599	0.070436	0.146136	0.303183	0.0697287	0.136299	#DIV/0!	0.189657	0.182048	0.337103	0.203713	0.224395	0.379658	0.360548	0.355636	0.0970165	0.371689	0.495123	0.170539	0.205708	0.228995	0.288577
55	0.0688108	0.209752	0.00800607	0.131407	0.0136343	0.28442	0.0558447	0.0511671	0.108981	0.104217	0.0502641	0.23452	0.0249923	0.222057	0.0492525	0.23698	0.124005	0.363934	0.0602593	0.306203	0.0828136	0.335972	0.139105	0.152948	0.0618927	0.591055	0.0543219	0.353038	0.030475	0.488154

## Sheet: I
time	mock ACT1	HIP ACT1	mock CIS3	HIP CIS3	mock RPL25	HIP RPL25
0	1	1	1	1	1	1
5	0.741361	0.556278	0.575691	0.378162	0.720463	0.525402
10	0.628587	0.475074	0.277429	0.152908	0.53371	0.392759
15	0.543943	0.269997	0.180185	0.0978351	0.432386	0.251641
20	0.501339	0.207304	0.122313	0.0991318	0.40706	0.317477
30	0.282492	0.164997	0.0743325	0.107485	0.212948	0.347239
40	0.16743	0.206475	0.0785744	0.111623	0.15339	0.356474
55	0.0798815	0.330987	0.06447	0.119769	0.150088	0.437709

## Sheet: J
time	mock ACT1	CHX ACT1	mock CIS3	CHX CIS3	mock RPL25	CHX RPL25
0	1	1	1	1	1	1
5	0.76727	0.887912	0.636339	0.701121	0.762579	0.876913
10	0.791601	0.856192	0.438703	0.480761	0.70274	0.844151
15	0.55619	0.732525	0.240569	0.303573	0.535913	0.535173
20	0.47188	0.649523	0.141492	0.169229	0.452591	0.578054
30	0.291069	0.418595	0.0631398	0.104024	0.216246	0.376115
40	0.221423	0.268387	0.068377	0.0809741	0.0946169	0.187982
55	0.101856	0.109307	0.0386334	0.0444271	0.0816027	0.108736
