# Supplementary material for: Non-invasive measurement of mRNA decay reveals translation initiation as the major determinant of mRNA stability
Source: eLife. 2018 Sep 7;7:e32536. doi: 10.7554/eLife.32536 (PMC6152797; doi:10.7554/eLife.32536)
Supplement: Figure 4—source data 1. [file elife-32536-fig4-data1.xlsx]

## Sheet: B
time	0 HIP	2.5 HIP	5 HIP	10 HIP	20 HIP	40 HIP	SEM(0)	SEM(2.5)	SEM(5)	SEM(10)	SEM(20)	SEM(40)
0	0.00803779	0.0141344	0.0153088	0.00684215	0.0197662	0.00459393	0.00403868	0.00730722	0.00707964	0.00363031	0.00940598	0.00187332
10	0.00648275	0.00984727	0.00749851	0.0182436	0.0356606	0.0567649	0.00187009	0.00442175	0.00425962	0.00261511	0.00799423	0.0259394
20	0.00625605	0.0131853	0.00411505	0.0272654	0.0516344	0.0547009	0.00372594	0.0028095	0.00226184	0.00587218	0.0102112	0.0184972
30	0.00226244	0.0095958	0.0127272	0.0379702	0.0478269	0.0763261	0.00226244	0.0023669	0.00487971	0.0113291	0.00160159	0.0238614
40	0.0145765	0.00572549	0.0200855	0.0431918	0.0489664	0.0642139	0.00520005	0.00452201	0.0122421	0.0106158	0.00453179	0.0172343
50	0.00773428	0.0149352	0.015388	0.0373367	0.0652006	0.065264	0.00542965	0.00457908	0.00375893	0.0101229	0.00724101	0.0198222
60	0.00707561	0.0129215	0.0224415	0.0460809	0.0862324	0.0608445	0.00333414	0.0028009	0.0060038	0.00524922	0.0144119	0.021009
70	0.019039	0.0125599	0.029385	0.0801131	0.0782562	0.0828434	0.00684926	0.00128556	0.012294	0.0119056	0.00321874	0.0220448
80	0.0184904	0.0187461	0.0316573	0.0938196	0.109046	0.0968697	0.00589287	0.00573836	0.0109716	0.0173029	0.0221437	0.0296969
90	0.0219264	0.0131791	0.0374948	0.108053	0.13798	0.123607	0.0055027	0.00317794	0.00893106	0.0174295	0.0196458	0.0365282
100	0.0188803	0.0247021	0.0655749	0.134116	0.167301	0.12845	0.00675444	0.00860775	0.0147314	0.0146418	0.0202893	0.0560831
110	0.023235	0.0306128	0.0617081	0.178155	0.172344	0.181325	0.00446461	0.00996298	0.0110952	0.0159208	0.00639613	0.0266399
120	0.0361013	0.0297264	0.0760605	0.221421	0.229855	0.241094	0.00818117	0.0173771	0.0228664	0.0193377	0.00909874	0.0481553

## Sheet: C
time	DMSO	HIP	HIP + CHX	HIP + SOR	SEM(DMSO)	SEM(HIP)	SEM(HIP + CHX)	SEM(HIP + SOR)
0	0.00803779	0.0197662	0.0167625	0.00915409	0.00403868	0.00940598	0.00244742	0.00471895
10	0.00648275	0.0356606	0.00890116	0.0256494	0.00187009	0.00799423	0.00636412	0.00708777
20	0.00625605	0.0516344	0.00597957	0.0388588	0.00372594	0.0102112	0.000836117	0.00550955
30	0.00226244	0.0478269	0.00695397	0.0350746	0.00226244	0.00160159	0.00170816	0.00558534
40	0.0145765	0.0489664	0.00621654	0.0447141	0.00520005	0.00453179	0.000265351	0.0209201
50	0.00773428	0.0652006	0.00414461	0.0431287	0.00542965	0.00724101	0.0021682	0.00984843
60	0.00707561	0.0862324	0.00894024	0.063011	0.00333414	0.0144119	0.00211441	0.0155667
70	0.019039	0.0782562	0.00969022	0.0559314	0.00684926	0.00321874	0.00186536	0.0129286
80	0.0184904	0.109046	0.00577124	0.0386975	0.00589287	0.0221437	0.000680397	0.00652379
90	0.0219264	0.13798	0.00647597	0.0369983	0.0055027	0.0196458	0.00216037	0.00926032
100	0.0188803	0.167301	0.0035424	0.0483911	0.00675444	0.0202893	0.00131522	0.00935649
110	0.023235	0.172344	0.00844537	0.0568117	0.00446461	0.00639613	0.0014568	0.0151248
120	0.0361013	0.229855	0.00524522	0.0549884	0.00818117	0.00909874	0.00154626	0.0183693

## Sheet: F
time	coloc.	SEM(coloc.)
0	0	0
20	72.0051	5.9948
40	71.7913	5.83942
60	60.0369	3.61777
80	54.2268	3.69477
100	40.96	6.34112
120	32.6568	5.89579
140	29.8254	6.50387
160	22.7664	2.25656
180	20.5486	2.41098
