# Supplementary material for: Non-invasive measurement of mRNA decay reveals translation initiation as the major determinant of mRNA stability
Source: eLife journal article supplement (doi:10.7554/elife.32536), 2018-09-07
Supplement: supp [file elife_poa_e32536_Figure_1_source_data_1.xlsx]

## Sheet: Sheet1
time	ACT1	CIS3	RPL25
0	1	1	1
5	0.943432	0.800404	1.07348
10	0.713993	0.443824	0.807749
15	0.52992	0.244808	0.606079
20	0.478993	0.161687	0.627177
25	0.366807	0.112917	0.515285
30	0.223847	0.0833825	0.321894
35	0.203464	0.0595511	0.275723
40	0.137468	0.0600652	0.203789
45	0.0810612	0.0392615	0.152691
50	0.0646446	0.029155	0.13113
55	0.0347463	0.0255084	0.100792
