# Supplementary figures and images for: Non-invasive measurement of mRNA decay reveals translation initiation as the major determinant of mRNA stability
Source: eLife journal article supplement (doi:10.7554/elife.32536), 2018-09-07

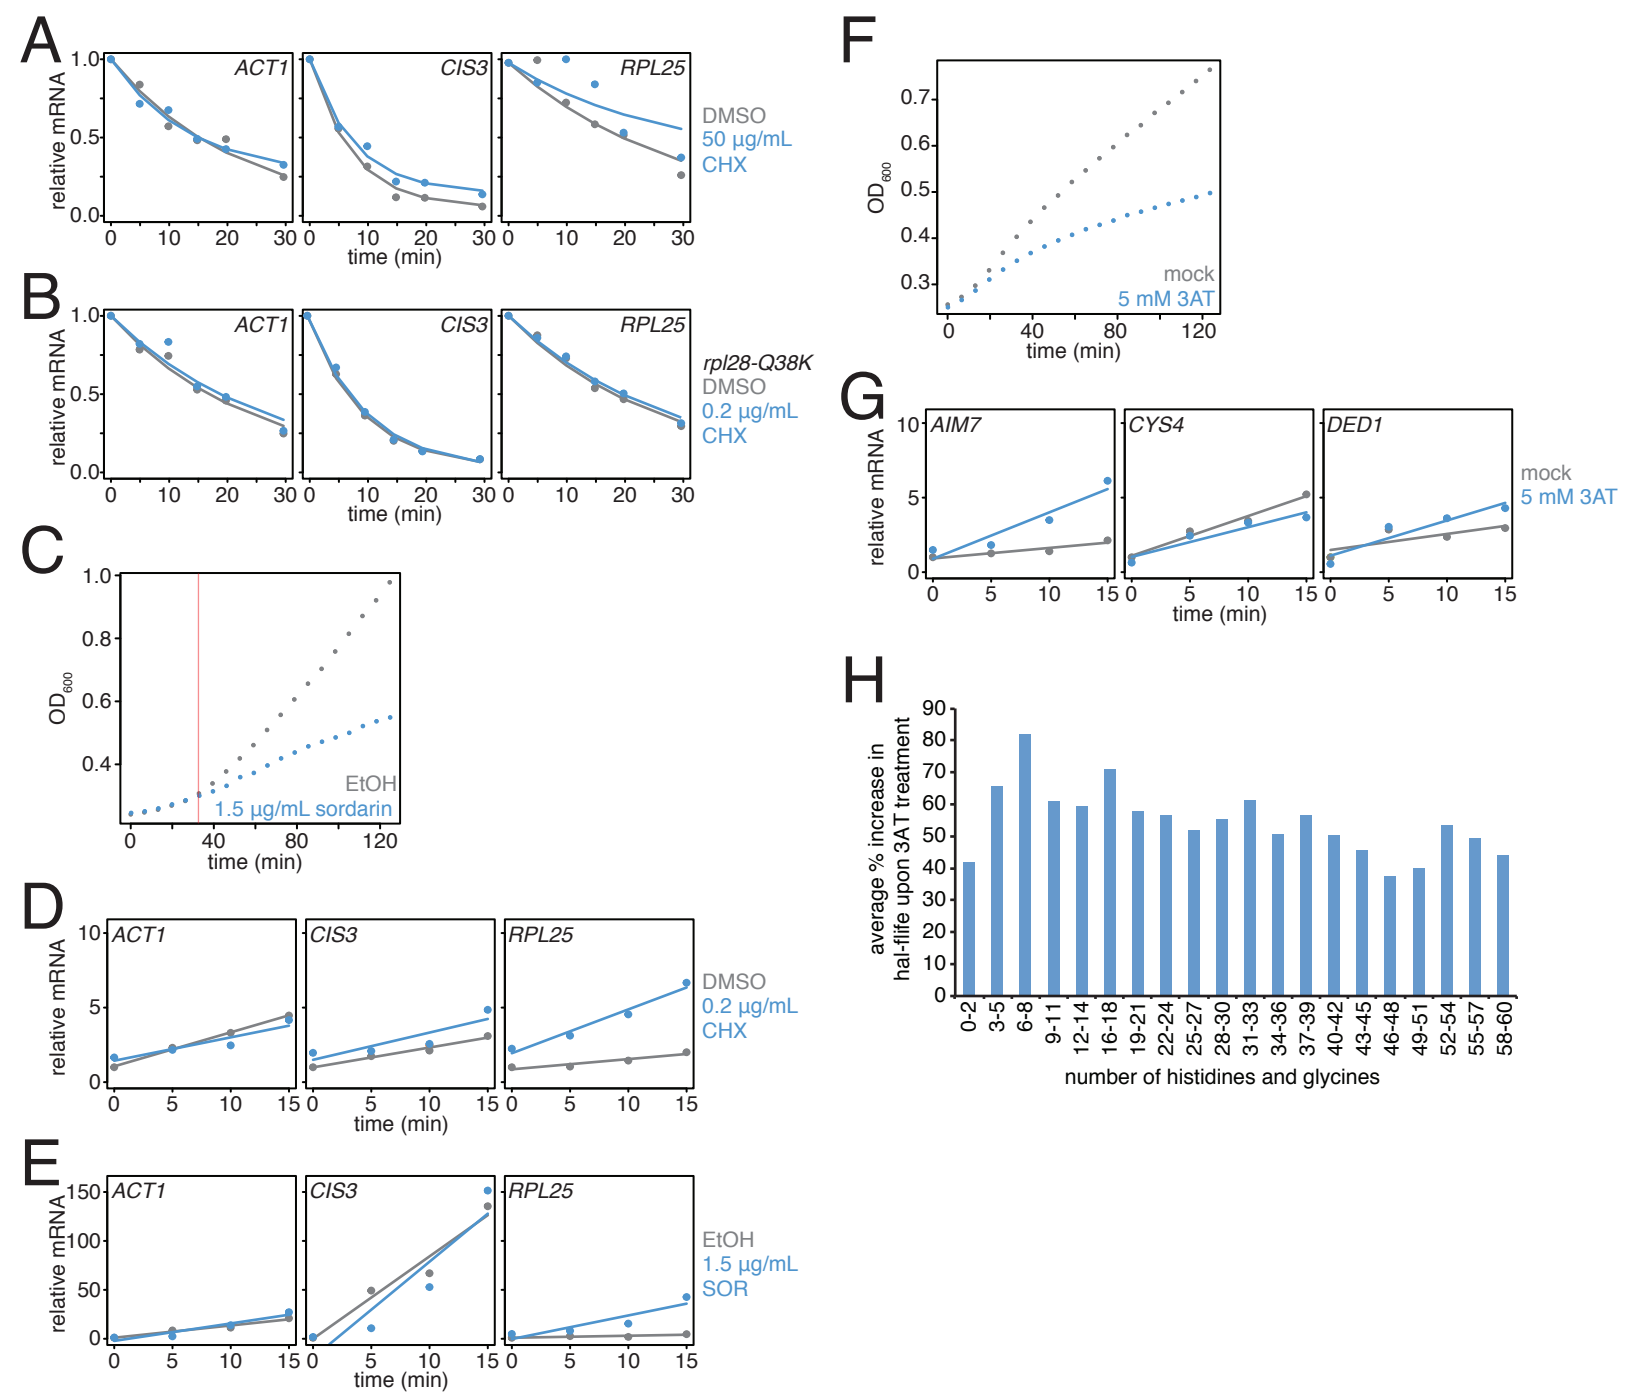

Figure 3-figure supplement 1

Supplement: supp [file elife-32536-supp-v1.zip]

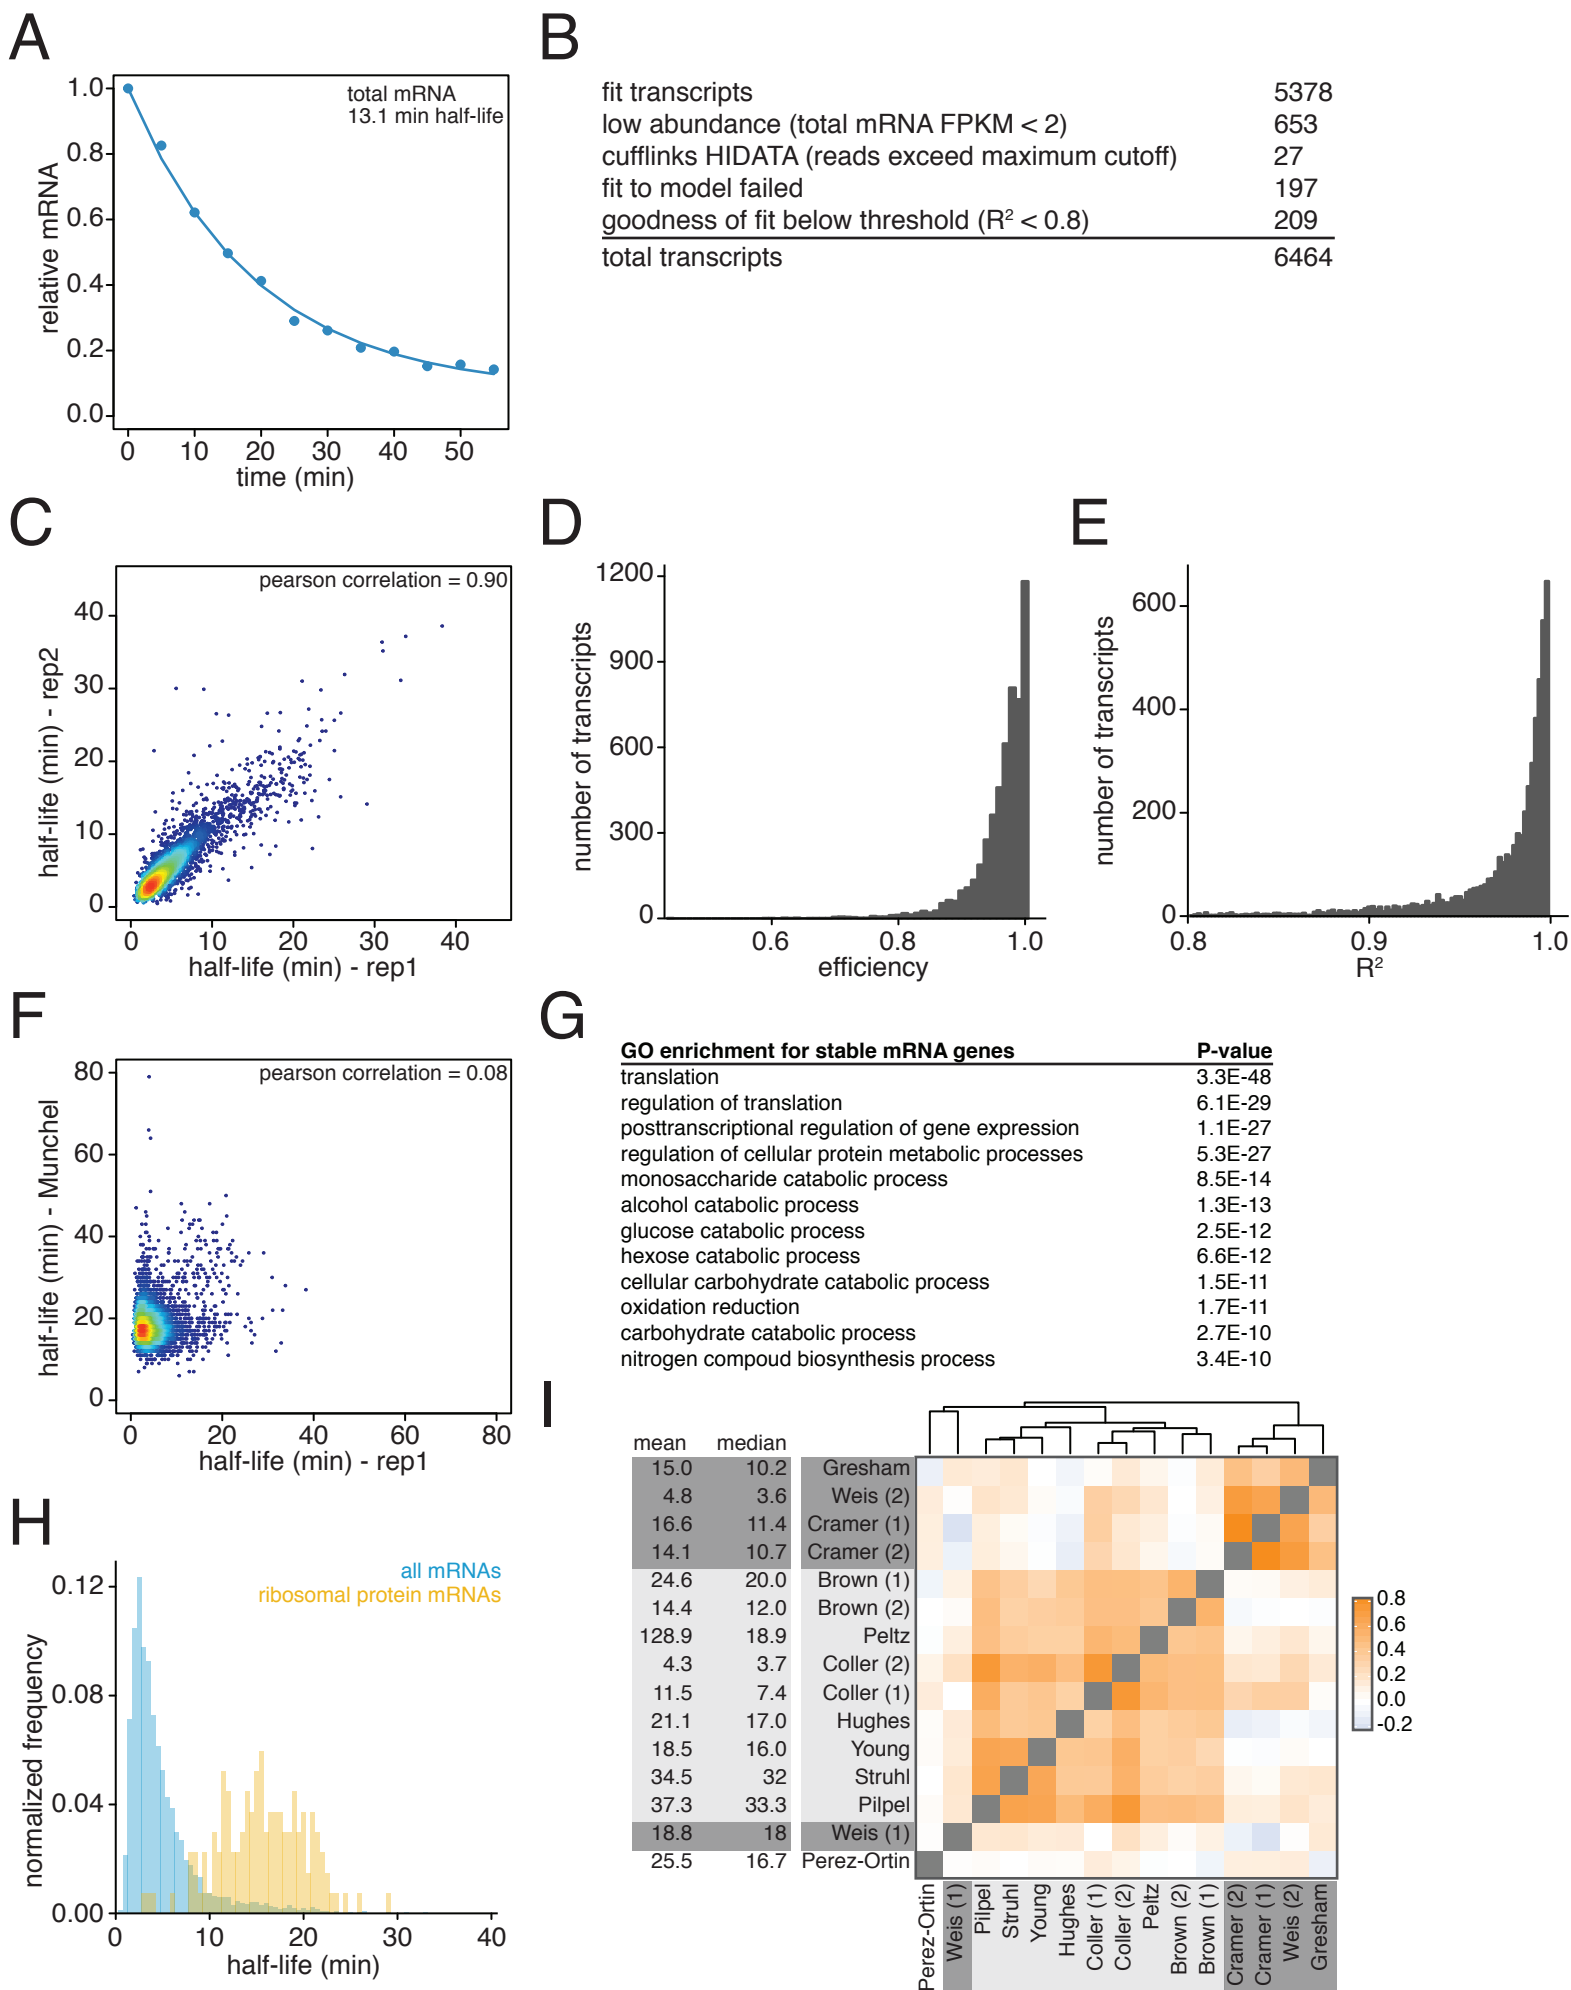

Figure 1-figure supplement 1

Supplement: supp [file elife-32536-supp-v1.zip]

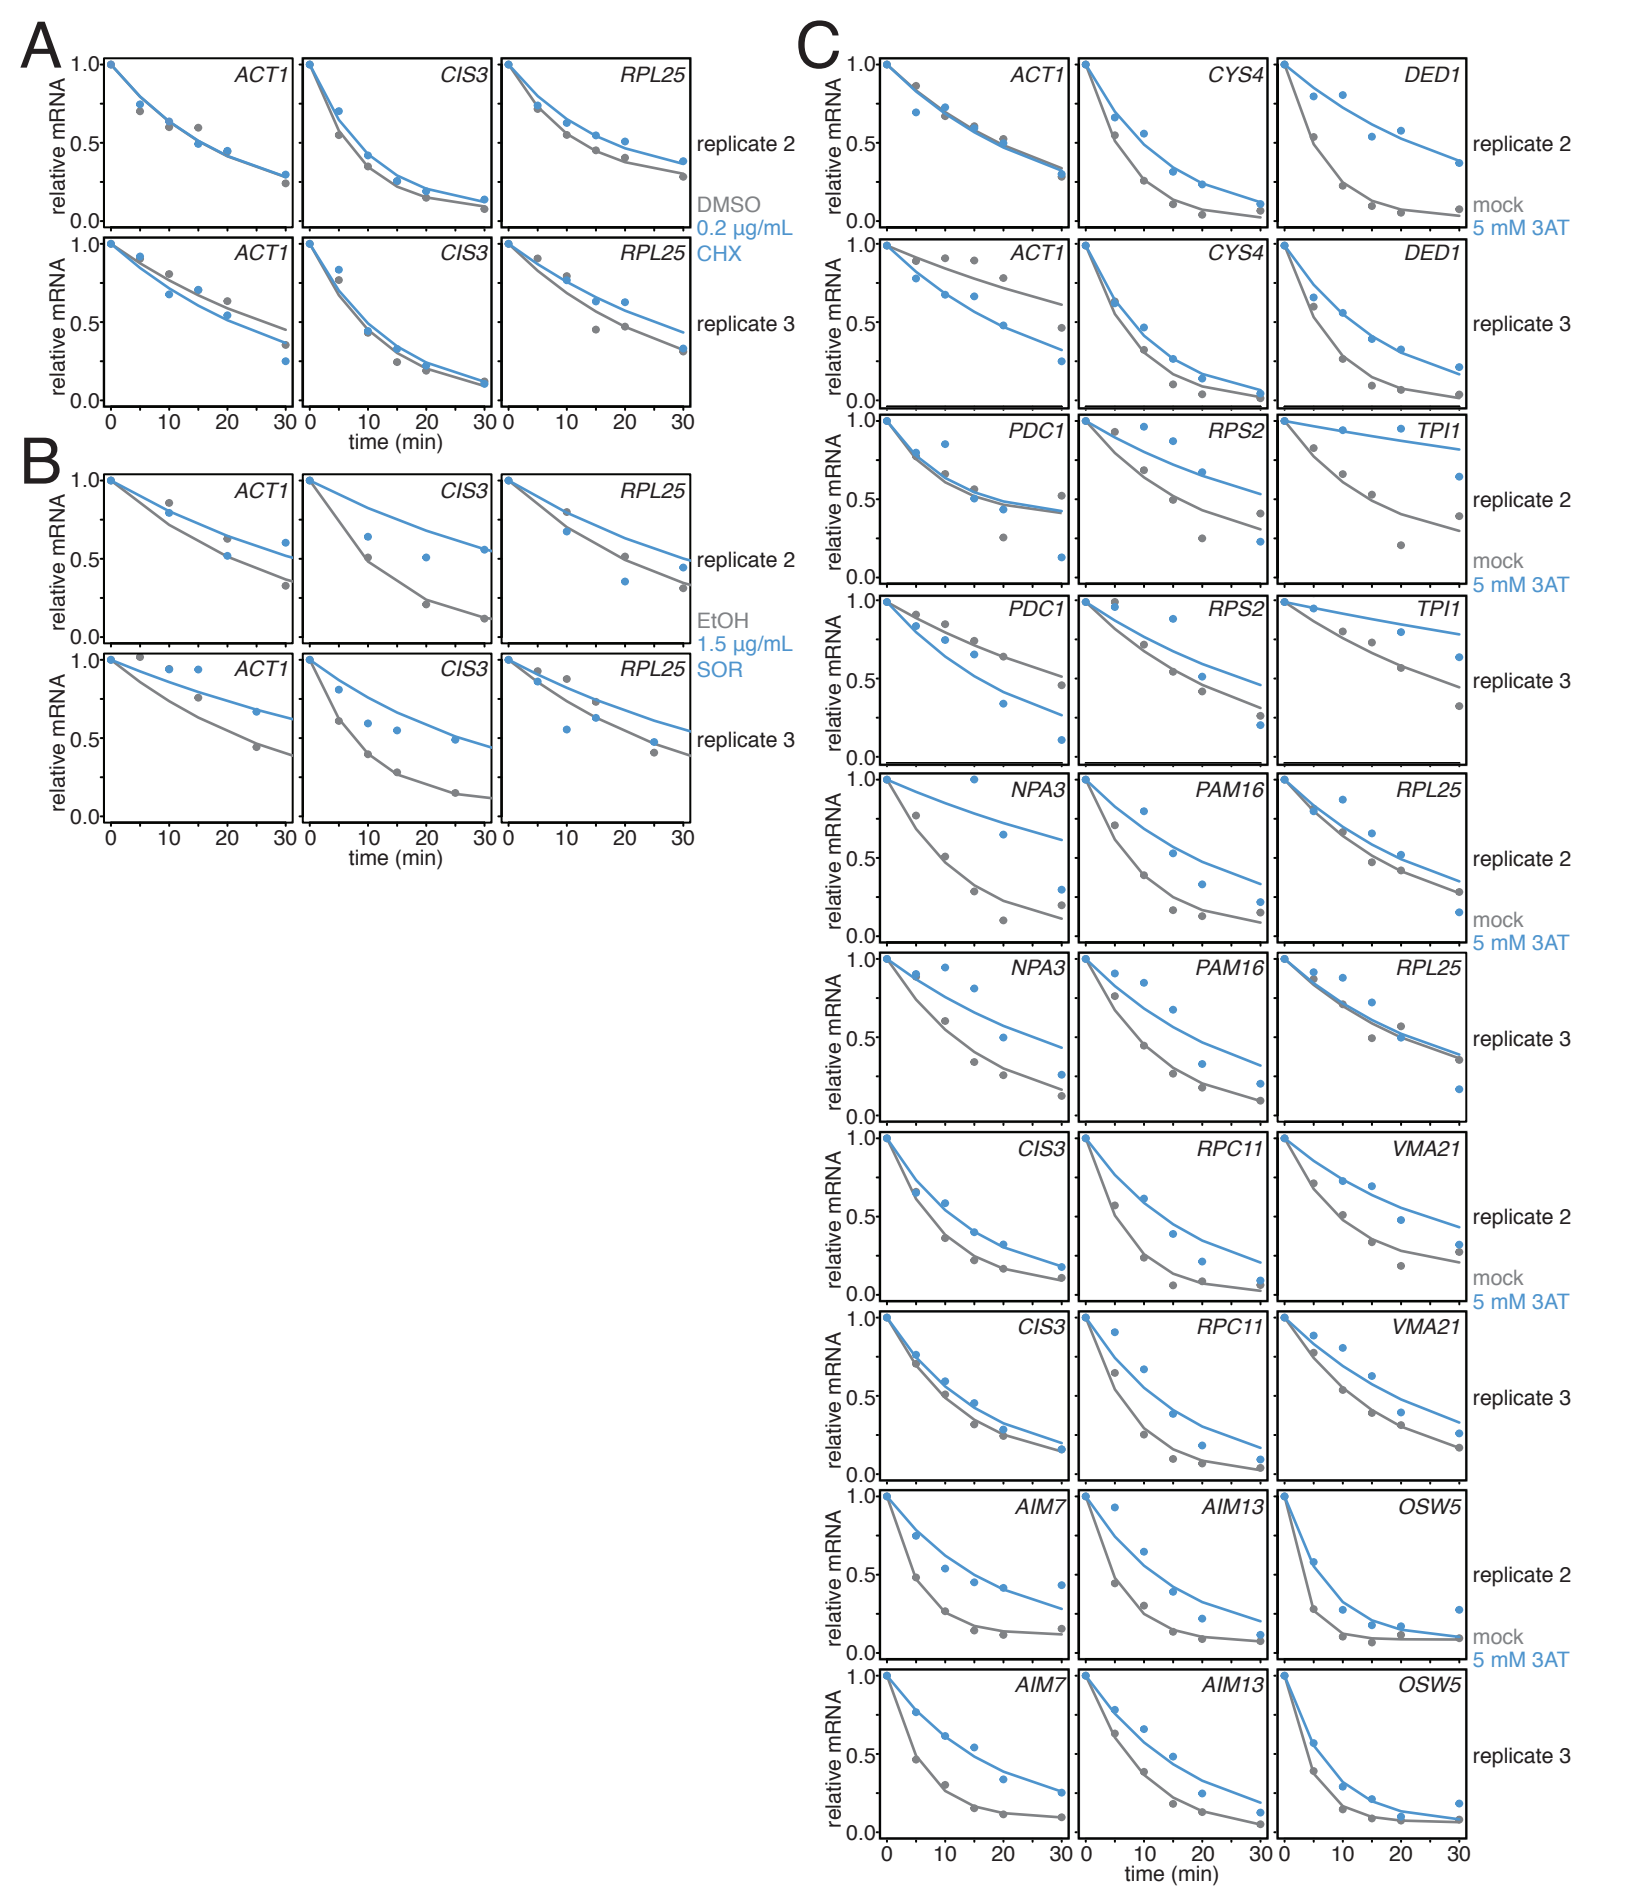

Figure 3-figure supplement 2

Supplement: supp [file elife-32536-supp-v1.zip]

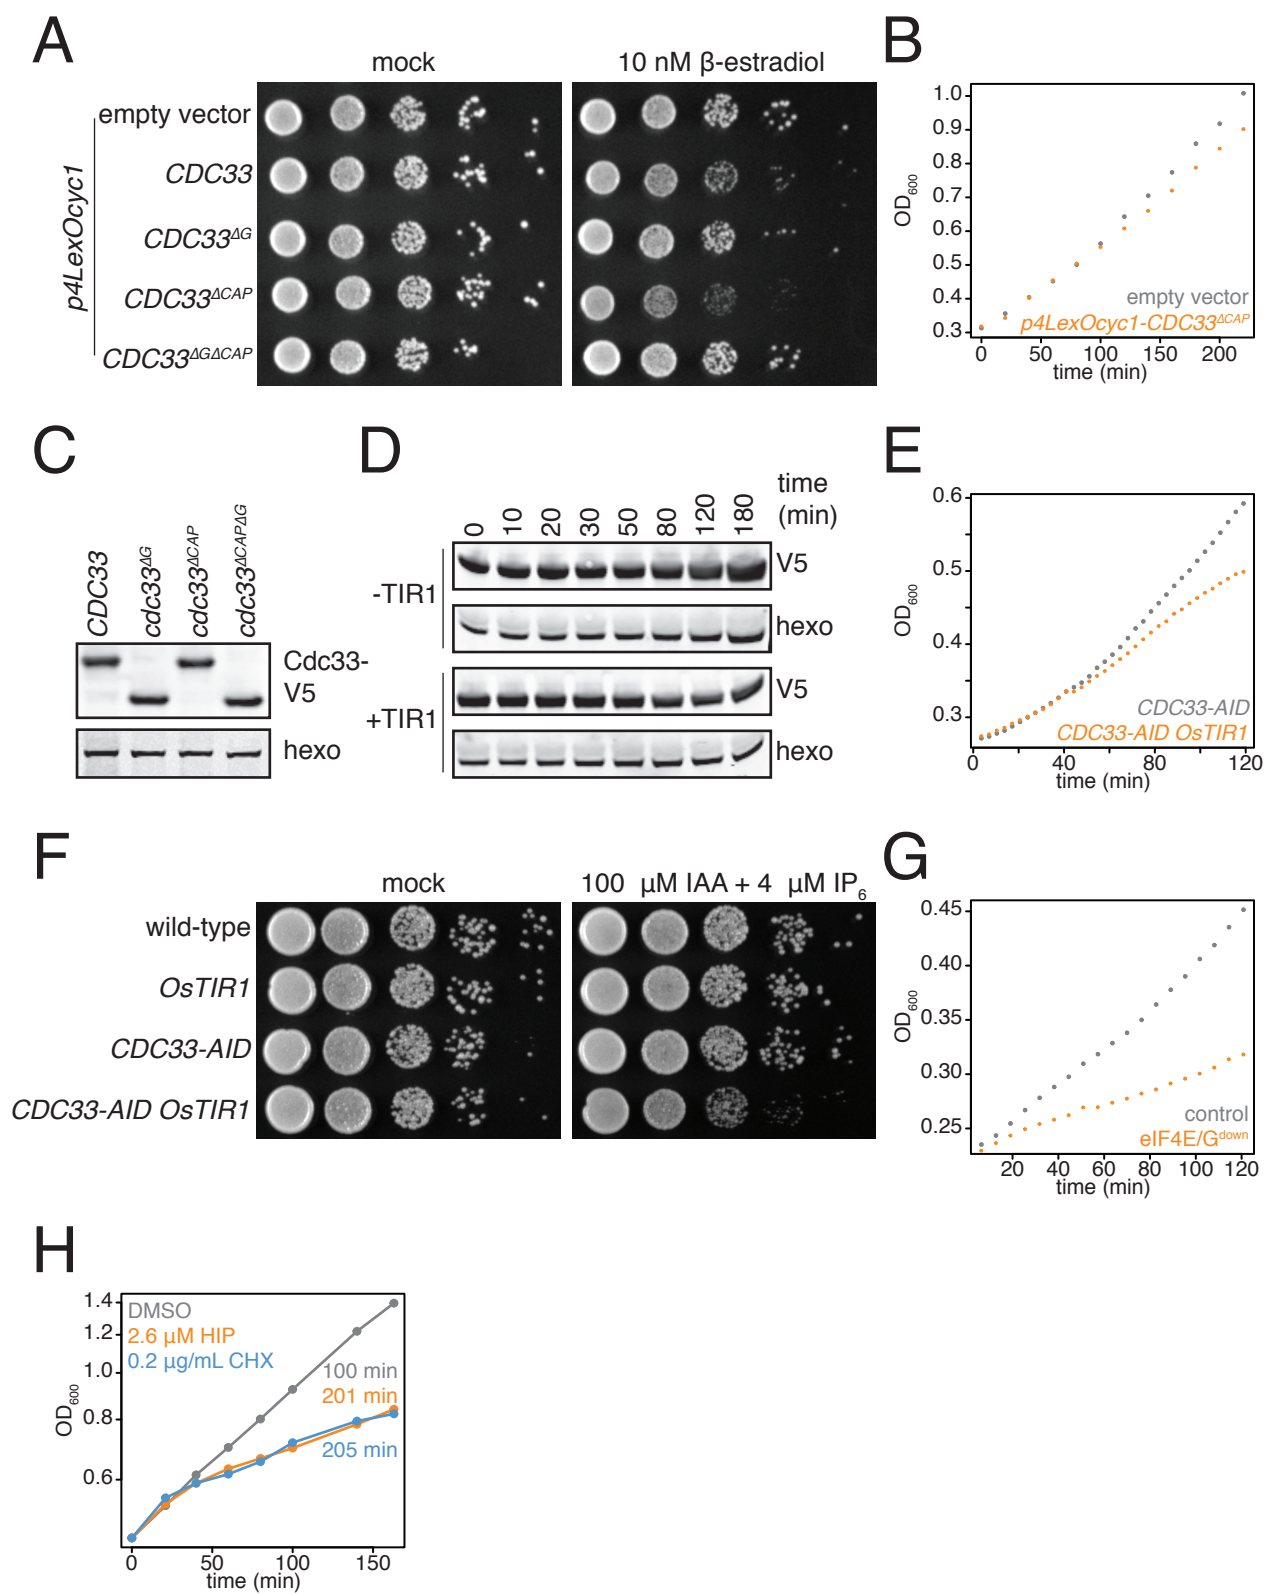

Figure 3-figure supplement 5

Supplement: supp [file elife-32536-supp-v1.zip]

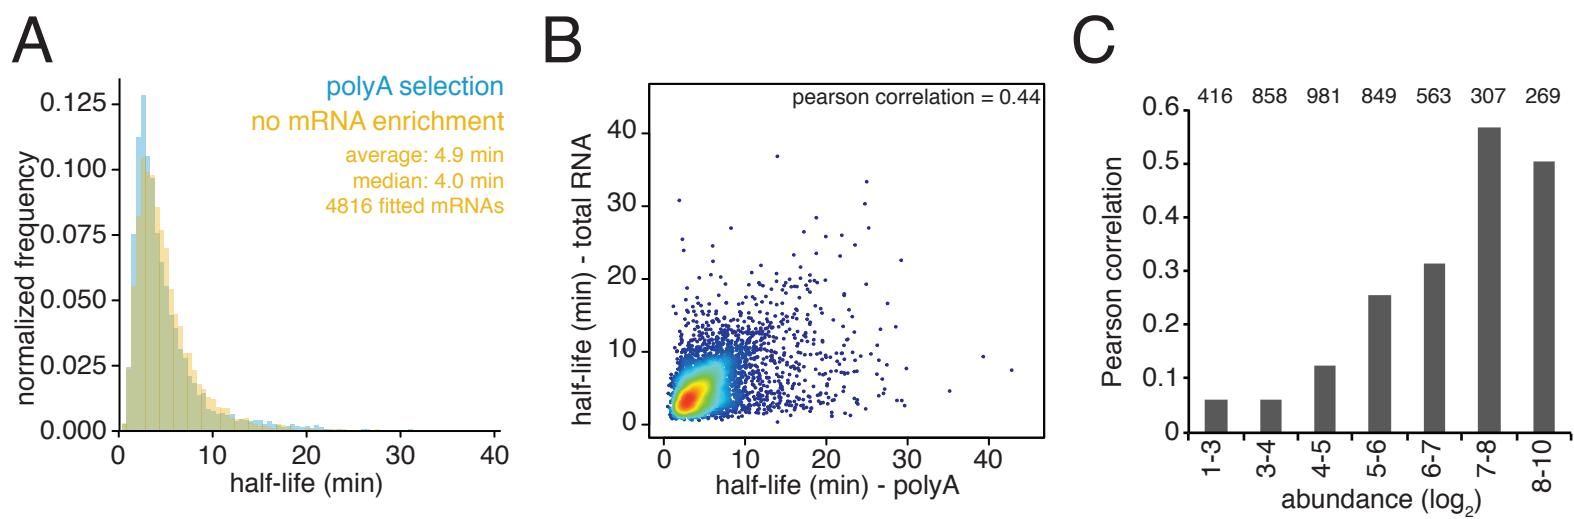

Figure 1-figure supplement 2

Supplement: supp [file elife-32536-supp-v1.zip]

A

## Cluster Dendrogram by Spearman Rank Correlation

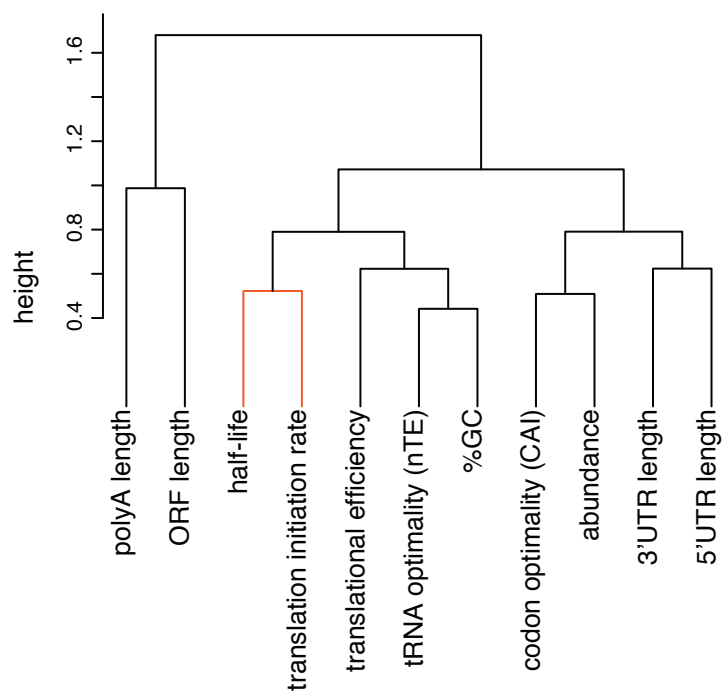

B

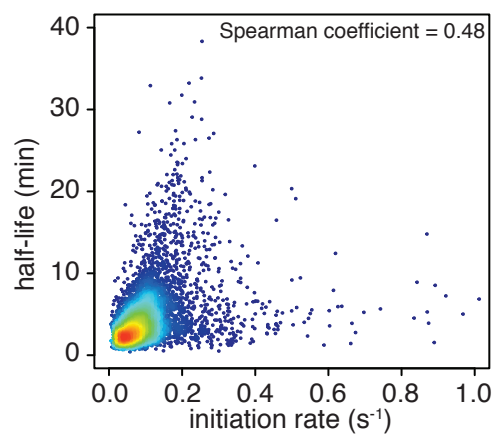

Supplement: supp [file elife-32536-supp-v1.zip]

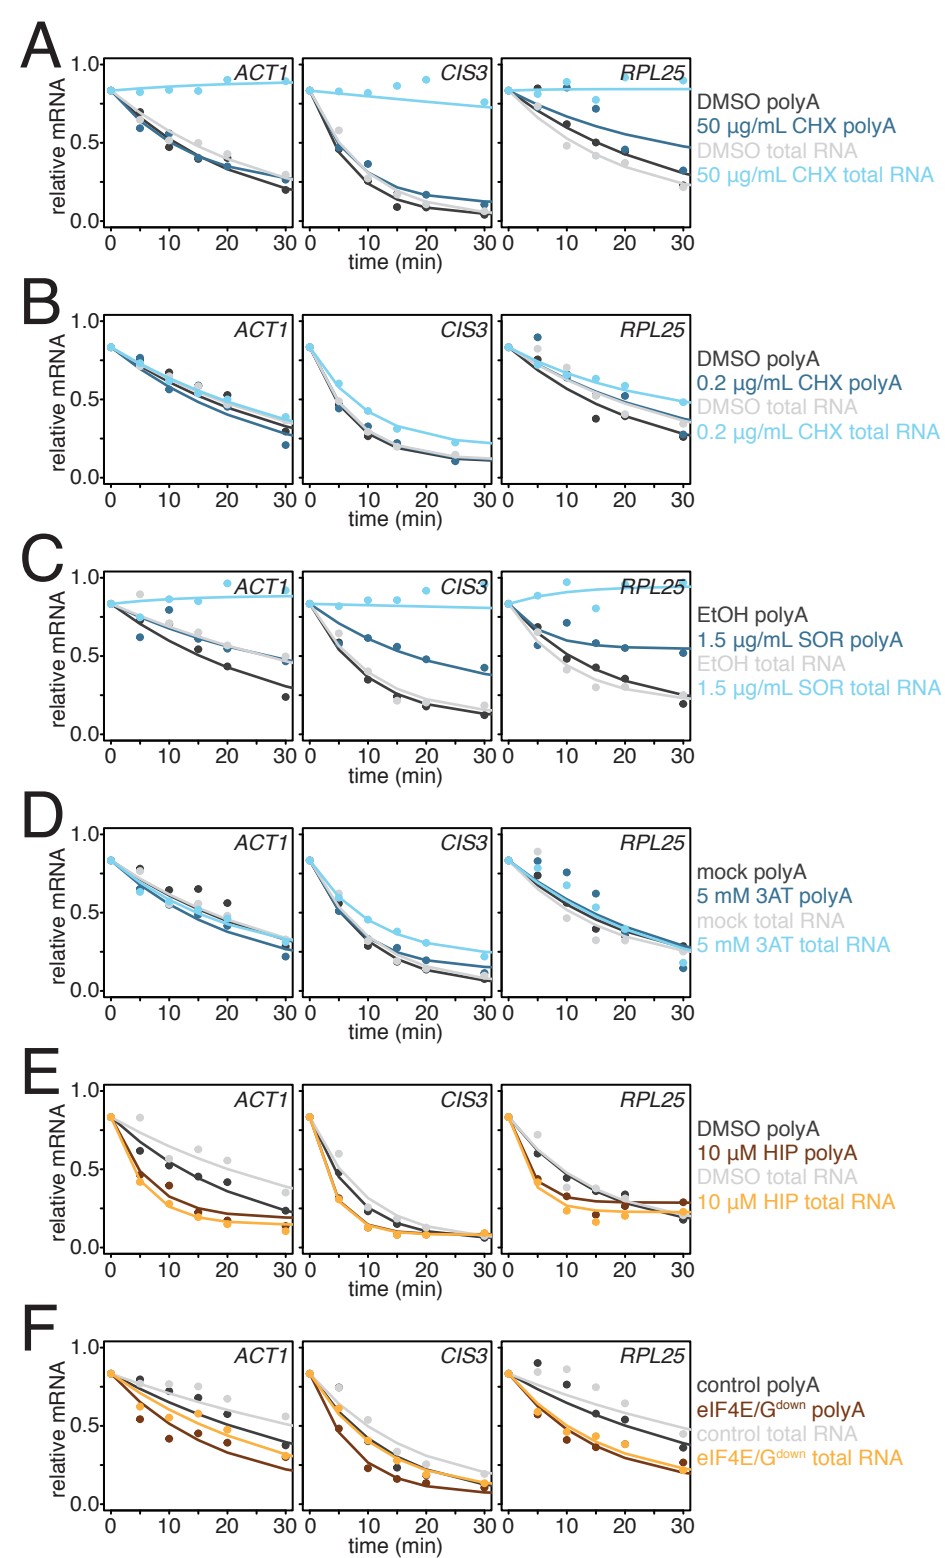

Figure 3-figure supplement 3

Supplement: supp [file elife-32536-supp-v1.zip]

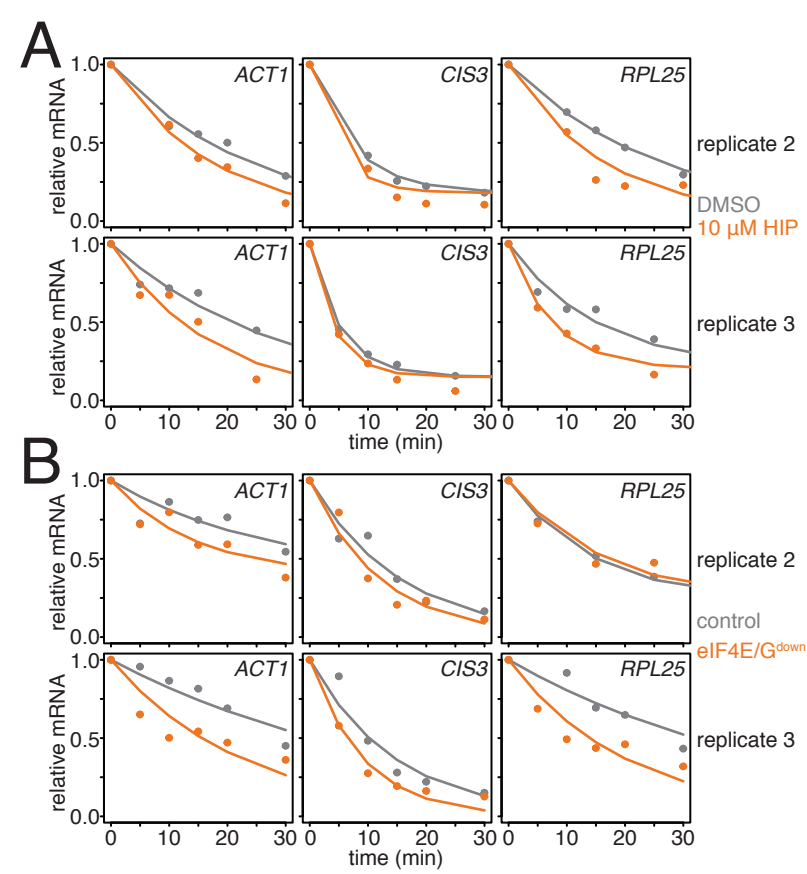

Figure 3-figure supplement 4

Supplement: supp [file elife-32536-supp-v1.zip]

A

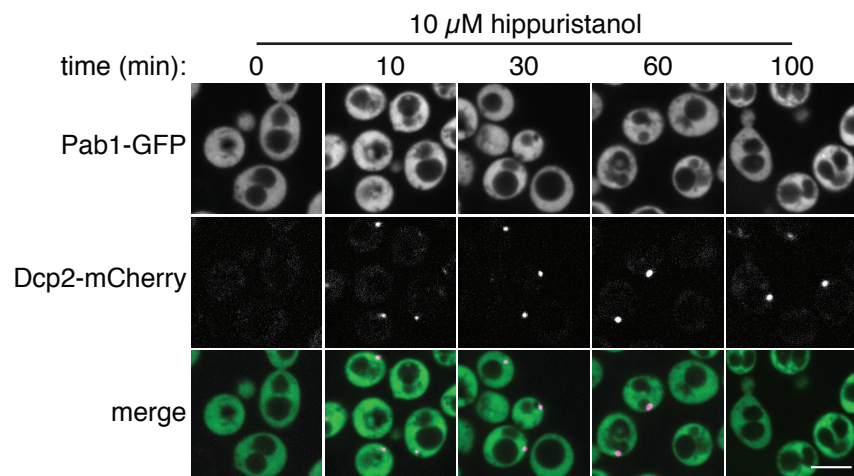

B

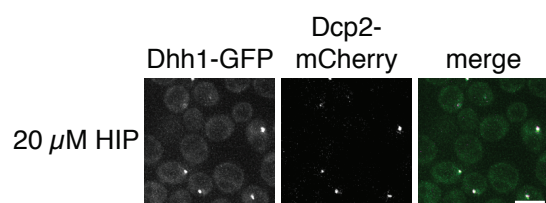

C

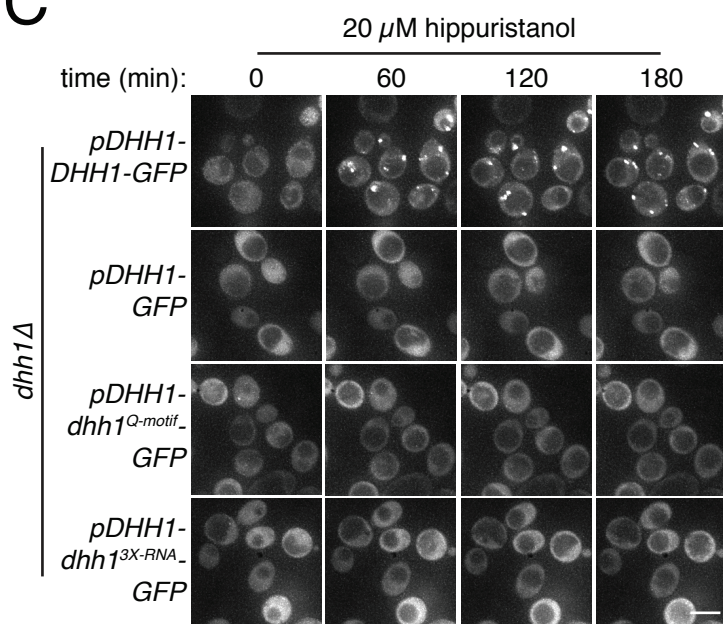

D

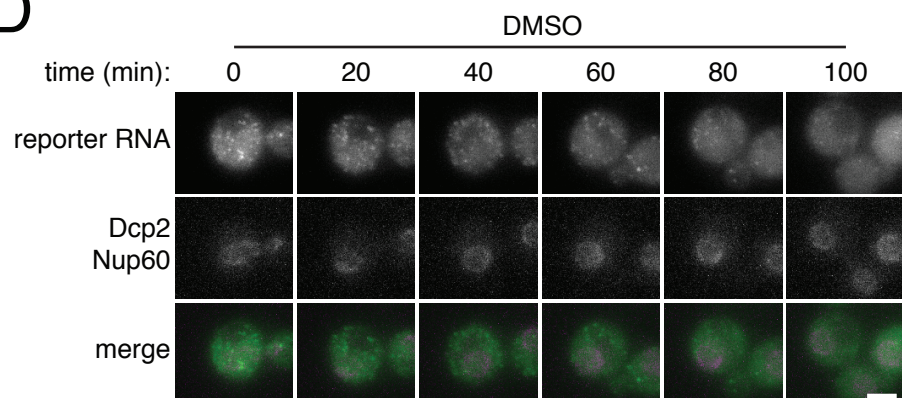

Figure 4-figure supplement 1

Supplement: supp [file elife-32536-supp-v1.zip]
